# Supplementary material for: DNMT1-PPARγ pathway in macrophages regulates chronic inflammation and atherosclerosis development in mice
Source: PubMed Central journal article supplement (PMC4987643; doi:10.1038/srep30053), 2016-08-17
Supplement: srep30053-s1.pdf [file srep30053-s1.pdf]

## DNMT1-PPAR $\gamma$ pathway in macrophages regulates chronic inflammation and atherosclerosis development in mice

Jie Yu<sup>1</sup>, Youzhu Qiu<sup>1</sup>, Jie Yang<sup>1</sup>, Shizhu Bian<sup>1</sup>, Guozhu Chen<sup>1</sup>, Mengyang Deng<sup>1</sup>, Huali Kang<sup>1</sup> and Lan Huang<sup>1\*</sup>

<sup>1</sup>Institute of Cardiovascular Diseases of the PLA, Xinqiao Hospital, Third Military Medical University, Chongqing, China, 400037

### Supplementary Figures

Supplementary Fig. 1

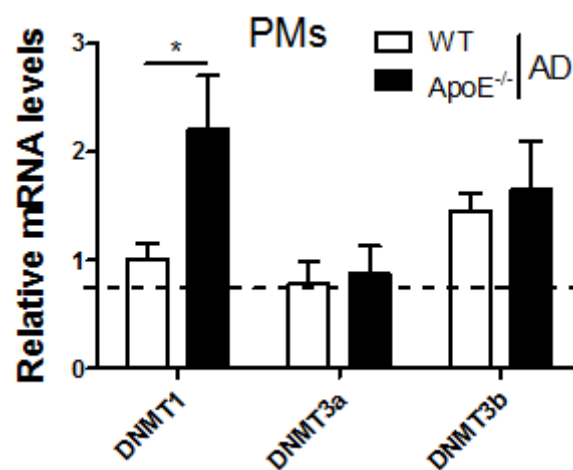

**Fig. 1 Increased DNMT1 mRNA levels in the peritoneal macrophages of ApoE<sup>-/-</sup> mice**

mRNA levels of DNMT1, DNMT3a and DNMT3b in the peritoneal macrophages (PMs) of male wild-type (WT) or ApoE-knockout (ApoE<sup>-/-</sup>) mice fed an atherogenic diet (AD) for 12 weeks (n=5, \*P<0.05).

## Supplementary Fig. 2

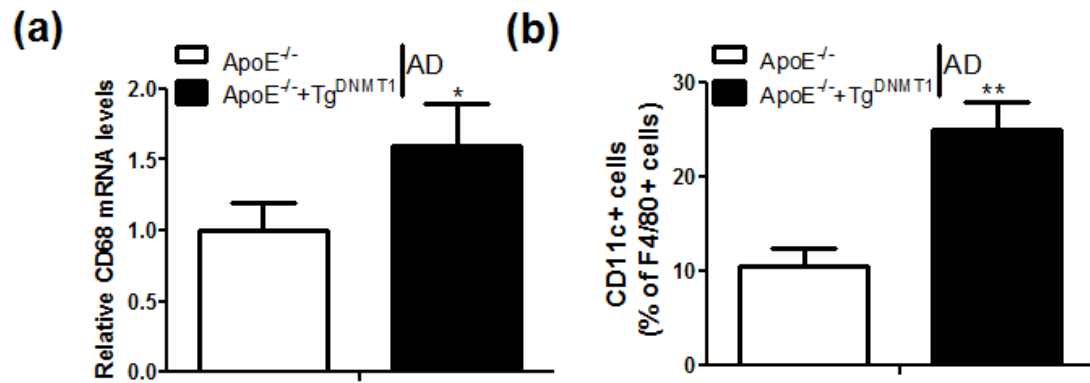

**Fig. 2 Elevated ratios of M1 macrophages in the arterial plaque of Tg<sup>DNMT1</sup>**

### **ApoE<sup>-/-</sup> mice**

(a) Relative CD68 mRNA levels in the arterial plaques from the ApoE<sup>-/-</sup> or macrophage DNMT1 transgenic (Tg<sup>DNMT1</sup>) ApoE<sup>-/-</sup> mice, which were fed an AD for 12 weeks (n=5, \*P<0.05).

(b) Percentage of CD11c+ cells in F4/80+ cells in the arterial plaque from the mice described in (a) (n=5, \*\*P<0.01).

### Supplementary Fig. 3

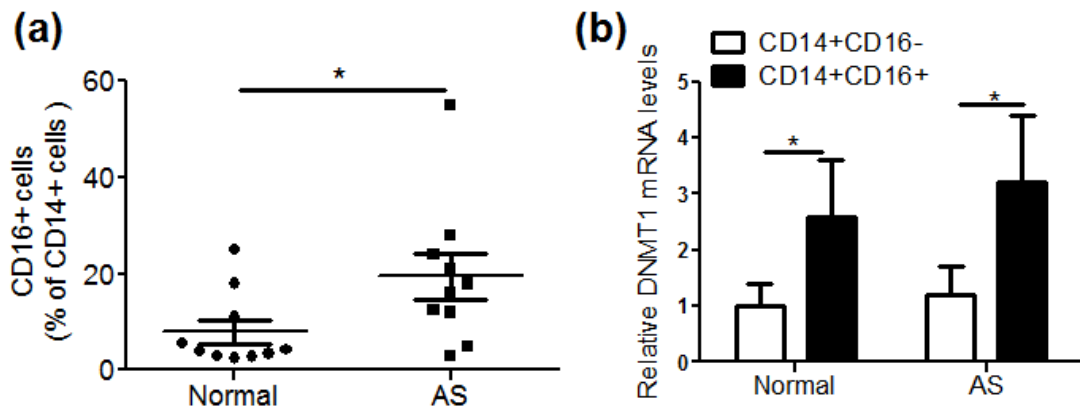

**Fig. 3 Elevated ratios and DNMT1 expression of CD14+CD16+ monocytes in the blood of patients with AS**

(a) Percentage of CD16+ cells in CD14+ cells in the peripheral blood monocytes isolated from the patients with AS or healthy donors (n=10, \*P<0.05).

(b) Relative DNMT1 mRNA levels in the CD14+CD16- cells or CD14+CD16+ cells from peripheral blood cells of patients with AS or healthy donors (n=10, \*P<0.05).
